# Supplementary material
Source: MDPI journal article supplement (https://www.mdpi.com/2071-1050/13/17/9746)

Article

# Essential oil-based nano-biopesticides: formulation and bioactivity against *Tribolium confusum*

Davide Palermo <sup>1</sup>, Giulia Giunti <sup>1\*</sup>, Francesca Laudani <sup>1</sup>, Vincenzo Palmeri <sup>1</sup> and Orlando Campolo <sup>1</sup>

<sup>1</sup> Department of Agriculture, *Mediterranean* University Reggio Calabria, Loc. Feo di Vito, 89122, Reggio Calabria (RC), Italy;  
davide.palermo@unirc.it; giulia.giunti@unirc.it; francesca.laudani@unirc.it; vpalmeri@unirc.it; orlando.campolo@unirc.it

\* Correspondence: giulia.giunti@unirc.it

**Supplementary Table S1.** GC-MS analysis of the selected EOs.

<sup>a</sup> Calculated Linear Retention Index

| Component                       | LRI <sup>a</sup> | <i>Pimpinella anisum</i> (%) | <i>Artemisia vulgaris</i> (%) | <i>Foeniculum vulgare</i> (%) | <i>Allium sativum</i> (%) | <i>Lavandula angustifolia</i> (%) | <i>Mentha piperita</i> (%) | <i>Rosmarinus officinalis</i> (%) | <i>Salvia officinalis</i> (%) |
|---------------------------------|------------------|------------------------------|-------------------------------|-------------------------------|---------------------------|-----------------------------------|----------------------------|-----------------------------------|-------------------------------|
| allyl methyl sulfide            | 699              |                              |                               |                               | 0.57                      |                                   |                            |                                   |                               |
| dimethyl disulfide              | 739              |                              |                               |                               | 0.04                      |                                   |                            |                                   |                               |
| hexan-2-one                     | 797              |                              |                               |                               | 0.03                      |                                   |                            |                                   |                               |
| 4-Methylthiazole                | 822              |                              |                               |                               | 0.01                      |                                   |                            |                                   |                               |
| allyl isopropyl sulfide         | 826              |                              |                               |                               | 0.01                      |                                   |                            |                                   |                               |
| furfural                        | 832              |                              |                               |                               | 0.01                      |                                   |                            |                                   |                               |
| 1,2-dithiolane                  | 842              |                              |                               |                               | 0.04                      |                                   |                            |                                   |                               |
| unknown 1                       | 851              |                              | 0.23                          |                               |                           |                                   |                            |                                   |                               |
| diallyl sulfide                 | 857              |                              |                               |                               | 11.09                     |                                   |                            |                                   |                               |
| allyl propyl sulfide            | 872              |                              |                               |                               | 0.04                      |                                   |                            |                                   |                               |
| allyl methyl disulfide          | 914              |                              |                               |                               | 2.3                       |                                   |                            |                                   |                               |
| tricyclene                      | 924              |                              | 0.86                          |                               |                           |                                   |                            |                                   |                               |
| $\alpha$ -thujene               | 928              |                              |                               |                               |                           | 0.05                              |                            |                                   | 0.21                          |
| methyl propyl disulfide         | 930              |                              |                               |                               | 0.01                      |                                   |                            |                                   |                               |
| $\alpha$ -pinene                | 934              | 0.51                         | 0.61                          | 2.63                          |                           | 0.91                              | 1.98                       | 11.28                             | 21.2                          |
| 2-ethoxythiazole                | 944              |                              |                               |                               | 0.01                      |                                   |                            |                                   |                               |
| methyl (E)-1-propenyl disulfide | 947              |                              |                               |                               | 0.13                      |                                   |                            |                                   |                               |
| camphene                        | 947              |                              | 3.97                          | 0.31                          |                           | 0.13                              |                            | 3.01                              | 4.67                          |
| (E)-2-hexenal                   | 952              |                              |                               |                               | 0.03                      |                                   |                            |                                   |                               |
| verbenene                       | 953              |                              | 0.18                          |                               |                           |                                   |                            |                                   |                               |
| 3H-1,2-dithiolene               | 957              |                              |                               |                               | 0.13                      |                                   |                            |                                   |                               |
| dimethyl trisulfide             | 967              |                              |                               |                               | 0.02                      |                                   |                            |                                   |                               |
| benzaldehyde                    | 969              |                              |                               |                               | 0.02                      |                                   |                            |                                   |                               |
| sabinene                        | 971              | 0.03                         | 0.62                          | 0.09                          |                           | 0.11                              | 0.34                       | 0.19                              |                               |
| $\beta$ -pinene                 | 974              | 0.16                         | 0.4                           | 0.98                          |                           | 0.23                              | 0.99                       | 4.01                              | 0.23                          |
| 3-(methylthio)-1-propanol       | 979              |                              |                               |                               | 0.01                      |                                   |                            |                                   |                               |
| 1,2,4-trimethylbenzene          | 986              |                              | 0.2                           |                               |                           |                                   |                            |                                   |                               |
| $\beta$ -myrcene                | 989              | 0.1                          | 1.75                          | 1.1                           |                           | 0.37                              | 0.12                       | 1.7                               | 1.2                           |

| Component                      | LRI <sup>a</sup> | <i>Pimpinella anisum</i> (%) | <i>Artemisia vulgaris</i> (%) | <i>Foeniculum vulgare</i> (%) | <i>Allium sativum</i> (%) | <i>Lavandula angustifolia</i> (%) | <i>Mentha piperita</i> (%) | <i>Rosmarinus officinalis</i> (%) | <i>Salvia officinalis</i> (%) |
|--------------------------------|------------------|------------------------------|-------------------------------|-------------------------------|---------------------------|-----------------------------------|----------------------------|-----------------------------------|-------------------------------|
| $\alpha$ -phellandrene         | 1002             | 0.31                         | 0.04                          | 2.52                          |                           |                                   |                            | 0.42                              | 0.1                           |
| $\delta$ -3-carene             | 1010             | 0.12                         |                               | 0.31                          |                           |                                   |                            | 0.3                               | 0.04                          |
| 1,2,3-trimethylbenzene         | 1014             |                              | 0.25                          |                               |                           |                                   |                            |                                   |                               |
| $\alpha$ -terpinene            | 1014             |                              |                               | 0.41                          |                           |                                   |                            | 2.01                              | 0.81                          |
| p-cymene                       | 1014             | 0.02                         | 1.52                          | 2.1                           |                           | 0.31                              |                            |                                   | 2.14                          |
| m-cymene                       | 1018             | 0.12                         |                               |                               |                           |                                   |                            |                                   |                               |
| o-cymene                       | 1019             |                              |                               |                               |                           |                                   |                            | 4.01                              |                               |
| $\beta$ -phellandrene          | 1025             | 0.19                         | 0.93                          |                               |                           |                                   |                            |                                   |                               |
| limonene                       | 1026             | 1.14                         |                               | 32.96                         |                           |                                   | 7.73                       |                                   |                               |
| eucalyptol                     | 1026             |                              | 4.21                          |                               |                           | 5.01                              |                            | 52.72                             | 20.7                          |
| (Z)- $\beta$ -ocimene          | 1024             |                              |                               | 0.5                           |                           | 0.58                              |                            | 0.05                              |                               |
| (E)- $\beta$ -ocimene          | 1044             |                              |                               |                               |                           | 0.27                              |                            |                                   |                               |
| allyl isopropyl disulfide      | 1050             |                              |                               |                               | 0.14                      |                                   |                            |                                   |                               |
| $\gamma$ -terpinene            | 1054             | 0.21                         | 0.33                          | 0.17                          |                           | 0.09                              |                            | 0.99                              | 1.54                          |
| trans-Sabinene hydrate         | 1063             |                              |                               |                               |                           | 0.13                              |                            |                                   |                               |
| 1-(Methylthio)-3-pentanone     | 1067             |                              |                               |                               | 0.01                      |                                   |                            |                                   |                               |
| linalool oxyde                 | 1069             |                              |                               |                               |                           | 0.06                              |                            |                                   |                               |
| fenchone                       | 1075             |                              |                               | 7.67                          |                           |                                   |                            |                                   |                               |
| diallyl disulfide              | 1080             |                              |                               |                               | 30.09                     |                                   |                            |                                   |                               |
| terpinolene                    | 1085             | 0.05                         | 0.12                          | 0.2                           |                           | 0.06                              |                            | 0.5                               | 0.52                          |
| unknown 2                      | 1089             |                              | 1.16                          |                               |                           |                                   |                            |                                   |                               |
| allyl (Z)-1-propenyl disulfide | 1093             |                              |                               |                               | 0.19                      |                                   |                            |                                   |                               |
| $\alpha$ -thujone              | 1093             |                              | 28.42                         |                               |                           |                                   |                            |                                   | 16.23                         |
| linalool                       | 1094             | 1.94                         |                               | 0.73                          |                           | 38.12                             |                            | 0.67                              |                               |
| allyl (E)-1-propenyl disulfide | 1099             |                              |                               |                               | 0                         |                                   |                            |                                   |                               |
| $\beta$ -thujone               | 1103             |                              | 13.35                         |                               |                           |                                   |                            |                                   | 4.42                          |
| chrysanthenone                 | 1109             |                              | 5.97                          |                               |                           |                                   |                            |                                   |                               |
| (Z)- $\beta$ -terpineol        | 1118             |                              | 0.84                          |                               |                           |                                   |                            |                                   |                               |
| camphor                        | 1129             | 0.04                         | 22.21                         | 0.1                           |                           | 7.01                              |                            | 12.04                             | 12.85                         |
| trans-pinocarveol              | 1135             |                              | 1.01                          |                               |                           |                                   |                            |                                   |                               |
| unknown 3                      | 1135             |                              |                               |                               |                           |                                   |                            | 0.04                              |                               |

| Component                        | LRI <sup>a</sup> | <i>Pimpinella<br/>anisum</i> (%) | <i>Artemisia<br/>vulgaris</i> (%) | <i>Foeniculum<br/>vulgare</i> (%) | <i>Allium<br/>sativum</i> (%) | <i>Lavandula<br/>angustifolia</i><br>(%) | <i>Mentha<br/>piperita</i> (%) | <i>Rosmarinus<br/>officinalis</i> (%) | <i>Salvia<br/>officinalis</i> (%) |
|----------------------------------|------------------|----------------------------------|-----------------------------------|-----------------------------------|-------------------------------|------------------------------------------|--------------------------------|---------------------------------------|-----------------------------------|
| allyl methyl trisulfide          | 1138             |                                  |                                   |                                   | 3.31                          |                                          |                                |                                       |                                   |
| menthone                         | 1140             |                                  |                                   |                                   |                               |                                          | 22.1                           |                                       |                                   |
| pinocarvone                      | 1149             |                                  | 0.19                              |                                   |                               |                                          |                                |                                       |                                   |
| isomenthone                      | 1149             |                                  |                                   |                                   |                               |                                          | 8.75                           |                                       |                                   |
| isoborneol                       | 1153             |                                  |                                   |                                   |                               | 0.41                                     |                                |                                       |                                   |
| 4-methyl-1,2,3-trithiolane       | 1156             |                                  |                                   |                                   | 0.99                          |                                          |                                |                                       |                                   |
| menthofurane                     | 1156             |                                  |                                   |                                   |                               |                                          | 1.1                            |                                       |                                   |
| unknown 4                        | 1158             |                                  |                                   |                                   |                               |                                          |                                | 0.22                                  |                                   |
| (-) neomenthol                   | 1159             |                                  |                                   |                                   |                               |                                          | 6.32                           |                                       |                                   |
| borneol                          | 1161             |                                  | 0.96                              |                                   |                               | 2.67                                     |                                | 1.05                                  | 3.1                               |
| methyl (E)-1-propenyl trisulfide | 1166             |                                  |                                   |                                   | 0.01                          |                                          |                                |                                       |                                   |
| (-) menthol                      | 1170             |                                  |                                   |                                   |                               |                                          | 37.67                          |                                       |                                   |
| terpinene-4-ol                   | 1171             | 0.18                             | 0.69                              | 0.17                              |                               | 1.74                                     |                                | 0.42                                  |                                   |
| 4,5-dimethyl-2-propylthiazole    | 1174             |                                  |                                   |                                   | 0.01                          |                                          |                                |                                       |                                   |
| hexyl butyrate                   | 1181             |                                  |                                   |                                   |                               | 0.19                                     |                                |                                       |                                   |
| $\alpha$ -terpineol              | 1184             | 0.15                             |                                   |                                   |                               | 0.26                                     | 0.91                           | 1.1                                   |                                   |
| estragol                         | 1187             | 3.98                             |                                   | 2.1                               |                               |                                          |                                |                                       |                                   |
| 3-vinyl-4H-1,2-dithiine          | 1189             |                                  |                                   |                                   | 0.03                          |                                          |                                |                                       |                                   |
| $\alpha$ -phellandrene epoxide   | 1195             |                                  |                                   | 0.21                              |                               |                                          |                                |                                       |                                   |
| 4H-1,2,3-trithiine               | 1200             |                                  |                                   |                                   | 0.02                          |                                          |                                |                                       |                                   |
| allicin (diallyl thiosulfinate)  | 1208             |                                  |                                   |                                   | 0.02                          |                                          |                                |                                       |                                   |
| 2 vinyl-4H-1,3-dithiine          | 1215             |                                  |                                   |                                   | 0.03                          |                                          |                                |                                       |                                   |
| pulegone                         | 1224             |                                  |                                   |                                   |                               |                                          | 0.95                           |                                       |                                   |
| 4,5-dimethyl-2-butylthiazole     | 1226             |                                  |                                   |                                   | 0.08                          |                                          |                                |                                       |                                   |
| s-(+)carvone                     | 1226             |                                  |                                   |                                   |                               |                                          | 1.66                           |                                       |                                   |
| p-anisaldehyde                   | 1235             | 0.41                             |                                   | 0.72                              |                               |                                          |                                |                                       |                                   |
| piperitone                       | 1237             |                                  |                                   |                                   |                               |                                          | 0.98                           |                                       |                                   |
| (Z)-anethole                     | 1243             | 0.21                             |                                   | 0.3                               |                               |                                          |                                |                                       |                                   |
| linalyl acetate                  | 1252             |                                  |                                   |                                   |                               | 36.31                                    |                                |                                       |                                   |



| Component                               | LRI <sup>a</sup> | <i>Pimpinella anisum</i> (%) | <i>Artemisia vulgaris</i> (%) | <i>Foeniculum vulgare</i> (%) | <i>Allium sativum</i> (%) | <i>Lavandula angustifolia</i> (%) | <i>Mentha piperita</i> (%) | <i>Rosmarinus officinalis</i> (%) | <i>Salvia officinalis</i> (%) |
|-----------------------------------------|------------------|------------------------------|-------------------------------|-------------------------------|---------------------------|-----------------------------------|----------------------------|-----------------------------------|-------------------------------|
| $\alpha$ -cedrene                       | 1418             |                              |                               |                               |                           | 0.02                              |                            |                                   |                               |
| unknown 6                               | 1419             | 0.04                         |                               |                               | 0.2                       |                                   |                            |                                   |                               |
| $\beta$ -caryophyllene                  | 1425             | 0.21                         | 0.7                           |                               |                           | 2.21                              | 1.74                       | 2.1                               | 3.9                           |
| 3,6-dimethyl-1,2,5-trithiepane          | 1428             |                              |                               |                               | 0.01                      |                                   |                            |                                   |                               |
| $\beta$ -cubebene                       | 1433             |                              |                               |                               |                           |                                   | 0.5                        |                                   |                               |
| unknown 7                               | 1439             |                              |                               |                               |                           | 0.3                               |                            |                                   |                               |
| $\alpha$ -bergamotene                   | 1439             | 0.25                         | 0.19                          |                               |                           |                                   |                            |                                   |                               |
| 4-ethyl-2,3,5-trithia-6-octene          | 1444             |                              |                               |                               | 0.36                      |                                   |                            |                                   |                               |
| $\beta$ -farnesene                      | 1454             | 0.01                         |                               |                               |                           | 0.61                              |                            |                                   |                               |
| $\alpha$ -humulene                      | 1459             |                              |                               |                               |                           | 0.32                              | 0.12                       |                                   | 3.99                          |
| 4,6-dimethyl-1,2,5-trithiepane          | 1460             |                              |                               |                               | 0.06                      |                                   |                            |                                   |                               |
| $\alpha$ -elemene                       | 1474             |                              |                               |                               |                           | 0.05                              |                            |                                   |                               |
| $\gamma$ -muurolene                     | 1479             |                              |                               |                               |                           | 0.06                              | 0.03                       |                                   |                               |
| germacrene D                            | 1484             |                              | 0.8                           |                               |                           | 0.32                              | 0.39                       |                                   |                               |
| $\delta$ -guaiene                       | 1485             |                              |                               |                               |                           |                                   |                            |                                   | 0.04                          |
| germacrene B                            | 1501             |                              | 0.04                          |                               |                           |                                   | 0.13                       |                                   |                               |
| $\alpha$ -farnesene                     | 1503             | 0.02                         |                               |                               |                           |                                   |                            |                                   |                               |
| $\alpha$ -bisabolene                    | 1508             | 0.07                         |                               |                               |                           | 0.13                              |                            |                                   |                               |
| $\beta$ -cadinene                       | 1511             |                              |                               |                               |                           |                                   |                            | 0.01                              |                               |
| $\gamma$ -muurolene                     | 1515             | 0.01                         |                               |                               |                           |                                   |                            |                                   |                               |
| $\gamma$ -cadinene                      | 1515             |                              |                               |                               |                           | 0.14                              | 0.06                       |                                   |                               |
| $\beta$ -sesquiphellandrene             | 1521             |                              |                               |                               |                           | 0.13                              |                            |                                   |                               |
| $\delta$ -cadinene                      | 1524             | 0.05                         |                               |                               |                           |                                   | 0.17                       | 0.19                              |                               |
| diallyl tetrasulfide                    | 1544             |                              |                               |                               | 13.17                     |                                   |                            |                                   |                               |
| (E)-nerolidol                           | 1558             | 0.06                         |                               |                               |                           |                                   |                            |                                   |                               |
| allyl methyl pentasulfide               | 1573             |                              |                               |                               | 0.01                      |                                   |                            |                                   |                               |
| (+) spathulenol                         | 1579             |                              |                               |                               |                           |                                   | 0.03                       |                                   |                               |
| caryophyllene oxyde                     | 1582             |                              |                               |                               |                           | 0.1                               | 0.18                       | 0.16                              | 0.1                           |
| 7-methyl-4,5,8-trithia-1,10-undecadiene | 1583             |                              |                               |                               | 0.34                      |                                   |                            |                                   |                               |

| Component                                       | LRI <sup>a</sup> | <i>Pimpinella anisum</i> (%) | <i>Artemisia vulgaris</i> (%) | <i>Foeniculum vulgare</i> (%) | <i>Allium sativum</i> (%) | <i>Lavandula angustifolia</i> (%) | <i>Mentha piperita</i> (%) | <i>Rosmarinus officinalis</i> (%) | <i>Salvia officinalis</i> (%) |
|-------------------------------------------------|------------------|------------------------------|-------------------------------|-------------------------------|---------------------------|-----------------------------------|----------------------------|-----------------------------------|-------------------------------|
| 4-ethyl-6-methyl-1,2,3,5-tetrathiolane          | 1588             |                              |                               |                               | 0.05                      |                                   |                            |                                   |                               |
| 6-methyl-4,5,8-trithia-1,10-undecadiene         | 1592             |                              |                               |                               | 1.19                      |                                   |                            |                                   |                               |
| 2-thiopheneacetamide, N-propyl-                 | 1622             |                              |                               |                               | 0.05                      |                                   |                            |                                   |                               |
| 4-methyl-1,2,3,5,6-pentathiepane                | 1649             |                              |                               |                               | 0.22                      |                                   |                            |                                   |                               |
| t-muurolol                                      | 1654             | 0.06                         |                               |                               |                           |                                   |                            |                                   |                               |
| 6-ethyl-4,5,7,8-tetrathianonane                 | 1658             |                              |                               |                               | 0.15                      |                                   |                            |                                   |                               |
| 2-thiopheneacetamide, N-isobutyl-               | 1663             |                              |                               |                               | 0.21                      |                                   |                            |                                   |                               |
| foeniculin                                      | 1666             | 2.01                         |                               | 0.51                          |                           |                                   |                            |                                   |                               |
| $\alpha$ -bisabolol                             | 1678             |                              |                               |                               |                           | 0.1                               |                            |                                   |                               |
| hexathiepane                                    | 1680             |                              |                               |                               | 0.24                      |                                   |                            |                                   |                               |
| diallyl pentasulfide                            | 1755             |                              |                               |                               | 0.5                       |                                   |                            |                                   |                               |
| allyl methyl hexasulfide                        | 1781             |                              |                               |                               | 0.51                      |                                   |                            |                                   |                               |
| 8-methyl-4,5,6,9-tetrathia-1,11-dodecadiene     | 1815             |                              |                               |                               | 5.89                      |                                   |                            |                                   |                               |
| diallyl hexasulfide                             | 1897             |                              |                               |                               | 0.26                      |                                   |                            |                                   |                               |
| allyl methyl heptasulfide                       | 1922             |                              |                               |                               | 0.16                      |                                   |                            |                                   |                               |
| 2-methyl-1,3-benzothiazole                      | 1957             |                              |                               |                               | 0.36                      |                                   |                            |                                   |                               |
| 5-ethyl-7-pentyl-1,2,3,4,6-pentathiepane        | 2005             |                              |                               |                               | 0.32                      |                                   |                            |                                   |                               |
| cyclooctasulfur                                 | 2044             |                              |                               |                               | 0.08                      |                                   |                            |                                   |                               |
| 9-methyl-4,5,6,7,10-pentathia-1,12-tridecadiene | 2051             |                              |                               |                               | 0.9                       |                                   |                            |                                   |                               |

| Component                                       | LRI <sup>a</sup> | <i>Pimpinella<br/>anisum</i> (%) | <i>Artemisia<br/>vulgaris</i> (%) | <i>Foeniculum<br/>vulgare</i> (%) | <i>Allium<br/>sativum</i> (%) | <i>Lavandula<br/>angustifolia</i><br>(%) | <i>Mentha<br/>piperita</i> (%) | <i>Rosmarinus<br/>officinalis</i> (%) | <i>Salvia<br/>officinalis</i> (%) |
|-------------------------------------------------|------------------|----------------------------------|-----------------------------------|-----------------------------------|-------------------------------|------------------------------------------|--------------------------------|---------------------------------------|-----------------------------------|
| 8-methyl-4,5,6,7,10-pentathia-1,12-tridecadiene | 2056             |                                  |                                   |                                   | 0.68                          |                                          |                                |                                       |                                   |
| Monoterpene                                     |                  | 2.96                             | 11.33                             | 44.28                             |                               | 3.11                                     | 11.16                          | 28.47                                 | 32.66                             |
| Oxygenated monoterpene                          |                  | 2.31                             | 84.52                             | 8.88                              |                               | 87.88                                    | 80.65                          | 68.52                                 | 58.64                             |
| Sesquiterpene                                   |                  | 0.69                             | 2.31                              |                                   |                               | 4.43                                     | 4.05                           | 2.59                                  | 8.6                               |
| Oxygenated sesquiterpene                        |                  | 0.12                             |                                   |                                   |                               | 0.2                                      | 0.21                           | 0.16                                  | 0.1                               |
| Phenylpropene                                   |                  | 93.72                            |                                   | 46.84                             |                               |                                          | 3.93                           |                                       |                                   |
| Ester                                           |                  |                                  |                                   |                                   |                               | 0.19                                     |                                |                                       |                                   |
| Sulphur compounds                               |                  |                                  |                                   |                                   | 99.8                          |                                          |                                |                                       |                                   |
| Aromatic hydrocarbon                            |                  |                                  | 0.45                              |                                   |                               |                                          |                                |                                       |                                   |
| Total identified                                |                  | 99.80                            | 98.61                             | 100.00                            | 99.80                         | 95.81                                    | 100.00                         | 99.74                                 | 100.00                            |



**Supplementary Figure S1.** Dimensional values of nanoemulsions containing anise(A), artemisia(B), fennel(C), garlic(D), lavender(E), mint(F), rosemary(G) or sage(H) EO.

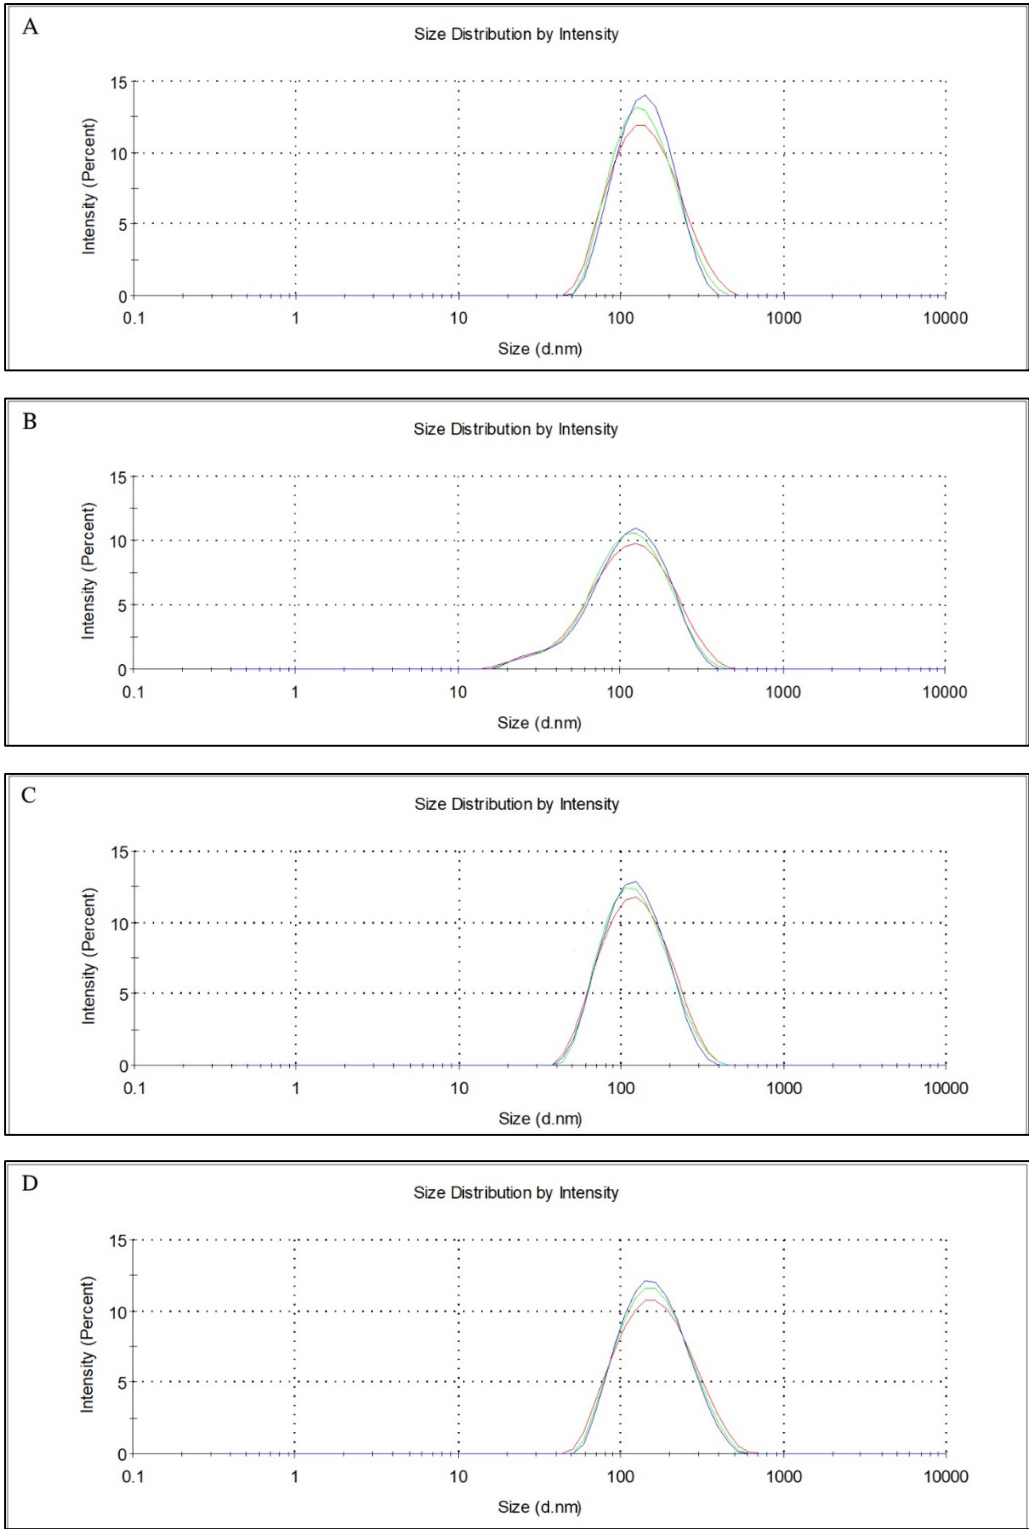

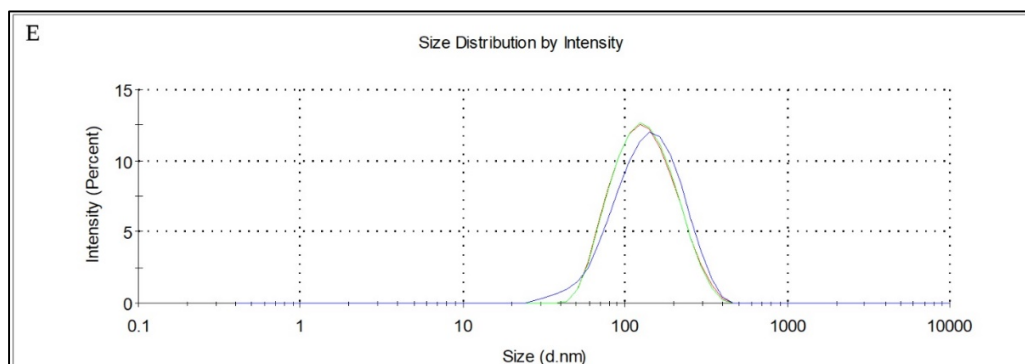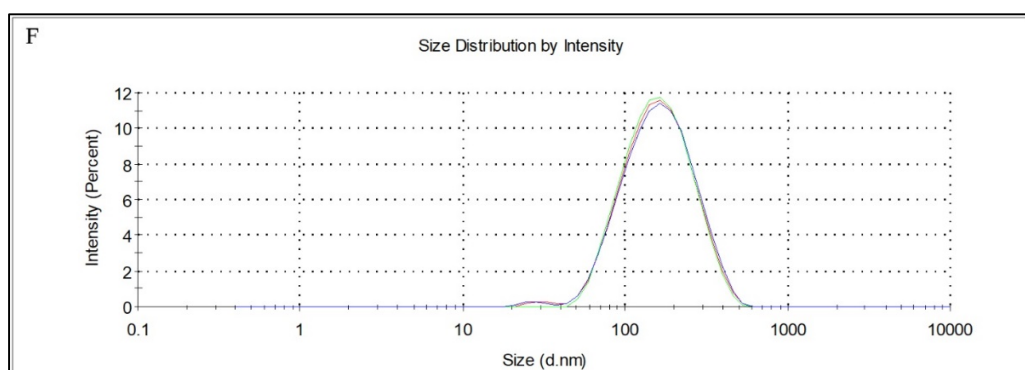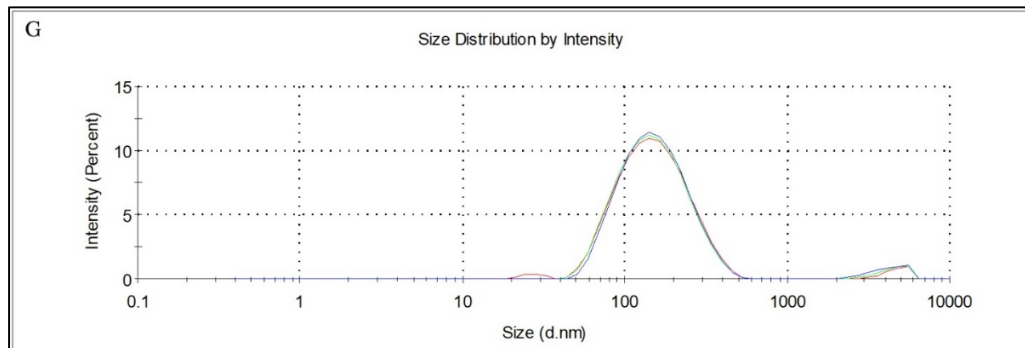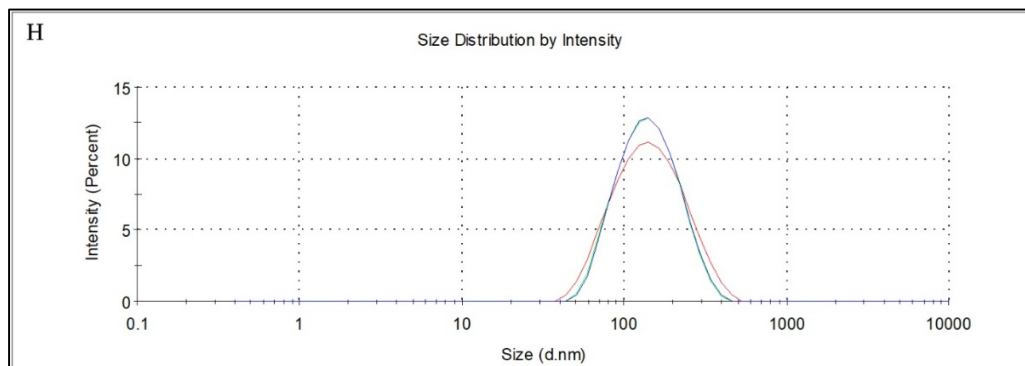

**Supplementary Figure S2.**  $\zeta$  potential values of nanoemulsions containing anise(A), artemisia(B), fennel(C), garlic(D), lavender(E), mint(F), rosemary(G) or sage(H) EO.

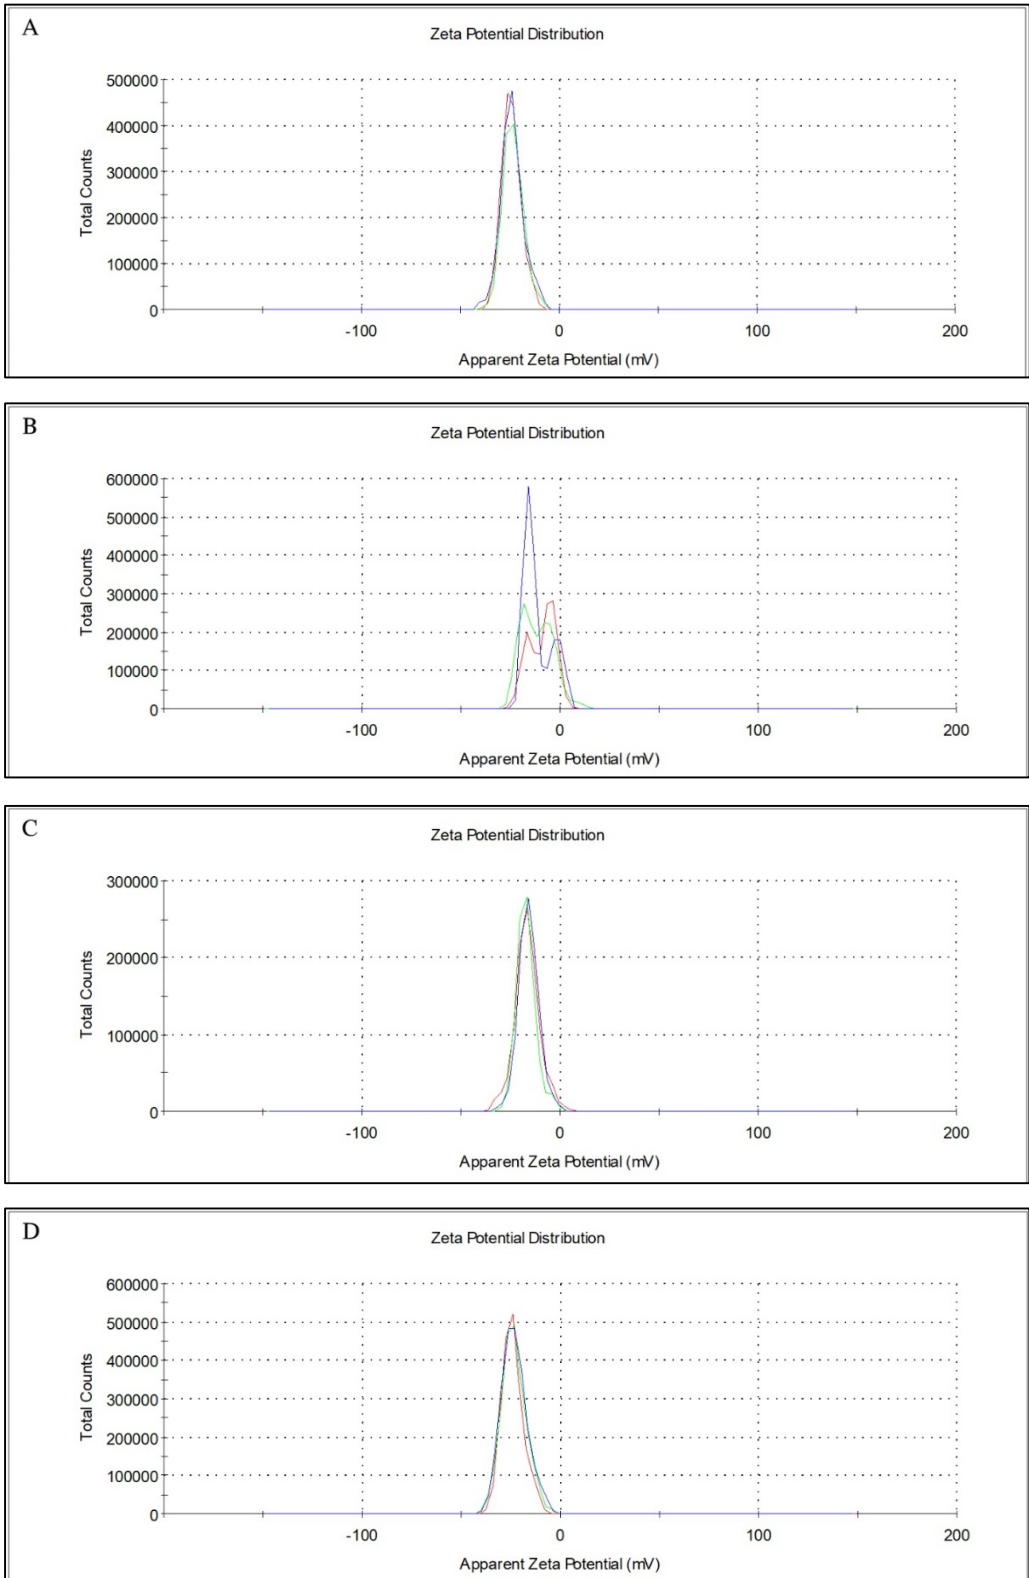

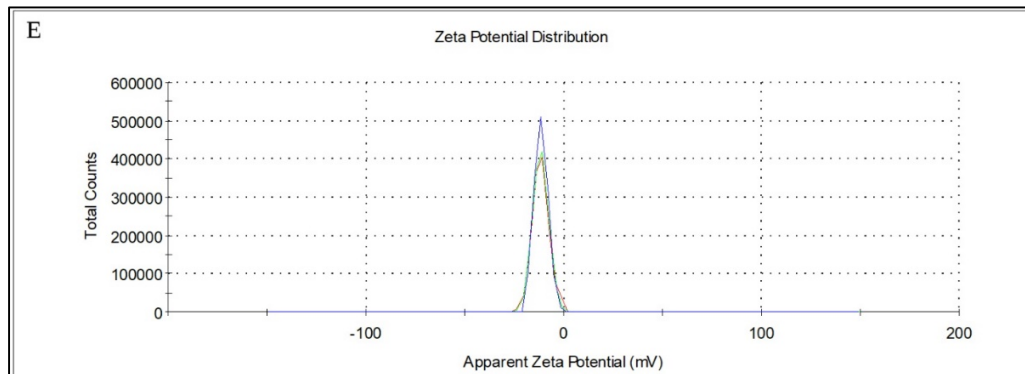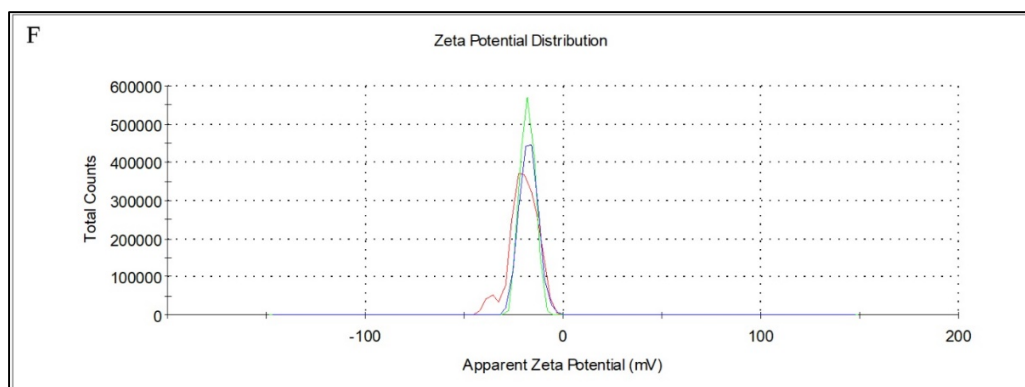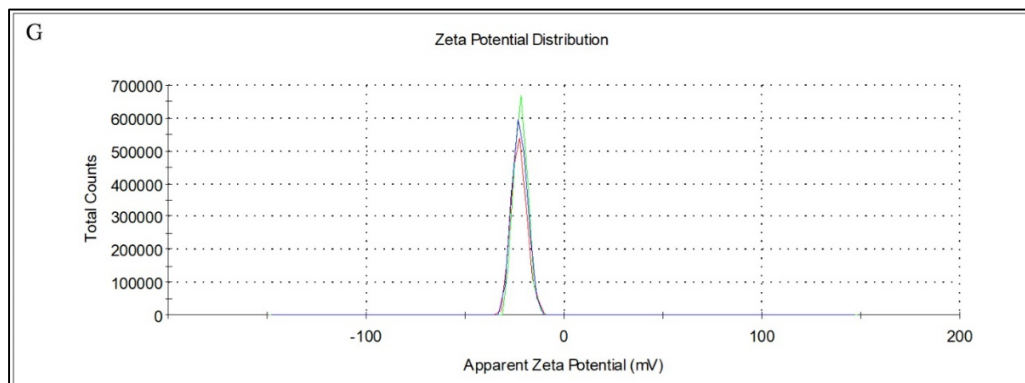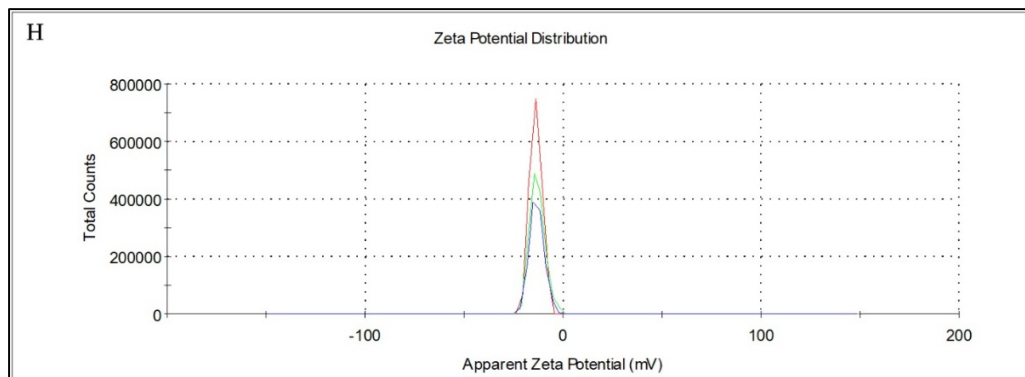

Supplement: s1 [file s1]
